# Supplementary material for: Hearing loss and depressive symptoms in older Chinese: whether social isolation plays a role
Source: PubMed Central journal article supplement (PMC9316428; doi:10.1186/s12877-022-03311-0), 2022-07-26
Supplement: 12877_2022_3311_MOESM1_ESM.pdf [file 12877_2022_3311_MOESM1_ESM.pdf]

**Supplementary table 1. The four types of social isolation question and the scoring criteria for the composite social isolation score.**

| Items <sup>^</sup>                           | Questions                                                                                                                                                              | Answers                                                  | Scoring         |                |                 |
|----------------------------------------------|------------------------------------------------------------------------------------------------------------------------------------------------------------------------|----------------------------------------------------------|-----------------|----------------|-----------------|
|                                              |                                                                                                                                                                        |                                                          | Score of 0 if:  | Score of 1 if: | Score of 2 if   |
| Face-to-face contact with co-inhabitants     | How many people do you spend time with on a regular basis (at least once a month; do not include phone/mail conversations; excluding the workplace; including family)? | “≥3people”, “< 3 people” and “Live alone                 | ≥ 3 people      | < 3 people     | Live alone      |
| Face-to-face contact with non-co-inhabitants | How often do you see any of your friends or relatives (do not include phone/mail conversations; excluding those who lived together)?                                   | “≥1 time/month”, “< 1 time/month” and “No such contact”  | ≥ 1 time /month | < 1 time/month | No such contact |
| Non-face-to-face contact (by telephone/mail) | Do you have any relatives or friends you don't often see but keep in contact with by phone or letter? How often do you contact them?                                   | “≥1 time/month”, “< 1 time/month”, and “No such contact” | ≥ 1 time /month | < 1 time/month | No such contact |
| Club/organization contact                    | How often do you join in activities of the GHHARE or other organizations?                                                                                              | “≥1 time/month” and “< 1 time/month”                     | ≥ 1 time /month | < 1 time/month | NA              |
| Composite score: sum of scores               |                                                                                                                                                                        |                                                          | 0~7             |                |                 |

**Supplementary table 2. The Chinese version of four types of social isolation question and the scoring criteria for the composite social isolation score.**

| 类型              | 问题                                               | 回答                       | 得分     |        |      |
|-----------------|--------------------------------------------------|--------------------------|--------|--------|------|
|                 |                                                  |                          | 0分:    | 1分:    | 2分   |
| 与同住者面对面接触       | 与您经常交往的人有多少个?(至少每月一次;不包括电话交谈;不包括工作场所,但包括家人)      | “不少于3人”,“少于3人”和“独居”      | 不少于3人  | 少于3人   | 独居   |
| 与非共同居住者面对面接触    | 与您的朋友、亲戚见面的频率(不包括与您同住的人)                         | “至少每月一次”,“少于每月一次”和“没有接触” | 至少每月一次 | 少于每月一次 | 没有接触 |
| 非面对面接触(通过电话/邮件) | 您是否有一些朋友或亲戚,虽然没经常见面,但通过电话和信件保持联系?如果是,您与他们联系的频率是? | “至少每月一次”,“少于每月一次”和“没有接触” | 至少每月一次 | 少于每月一次 | 没有接触 |
| 俱乐部/组织的接触       | 您是否有加入团体或协会?如果有,您参加他们活动的频率?                      | “至少每月一次”和“少于每月一次”        | 至少每月一次 | 少于每月一次 |      |
| 总分:             |                                                  |                          |        |        | 0~7  |

**Supplementary table 3.** Association of hearing loss with depressive symptoms (GDS-15 score  $\geq 8$ )

| Hearing status | Depressive symptoms (GDS-15 scores $\geq 8$ ), OR (95% CI) |                                  |                                  |                                 |                                 |
|----------------|------------------------------------------------------------|----------------------------------|----------------------------------|---------------------------------|---------------------------------|
|                | Number (% cases)                                           | Crude model                      | Model 1                          | Model 2                         | Model 3                         |
| <b>Good</b>    | 2256 (2.53)                                                | Ref (1.00)                       | Ref (1.00)                       | Ref (1.00)                      | Ref (1.00)                      |
| <b>Fair</b>    | 6094 (4.64)                                                | 1.88 (1.41, 2.51) <sup>***</sup> | 1.74 (1.30, 2.34) <sup>***</sup> | 1.57 (1.17, 2.11) <sup>**</sup> | 1.54 (1.15, 2.08) <sup>**</sup> |
| <b>Poor</b>    | 612 (7.35)                                                 | 3.06 (2.05, 4.58) <sup>***</sup> | 2.40 (1.58, 3.65) <sup>***</sup> | 1.78 (1.16, 2.73) <sup>**</sup> | 1.70 (1.10, 2.62) <sup>*</sup>  |

Ref=reference; OR=odds ratio; CI=confidence interval; GDS-15=the 15-item Geriatric Depression Scale

Model 1: adjusted for age, sex, income, education, occupation, smoking, alcohol use

Model 2: additionally adjusted for self-rated health, comorbidities

Model 3: additionally adjusted for social isolation

<sup>\*\*</sup>P<0.05

<sup>\*\*</sup>P<0.01

<sup>\*\*\*</sup>P<0.001

**Supplementary table 4.** Association of hearing loss with depressive symptoms after excluding participants with hearing aids (n=20)

| Hearing status | Depressive symptoms, OR (95% CI) |                                  |                                 |
|----------------|----------------------------------|----------------------------------|---------------------------------|
|                | Crude model                      | Model 1                          | Model 2                         |
| <b>Good</b>    | Ref (1.00)                       | Ref (1.00)                       | Ref (1.00)                      |
| <b>Fair</b>    | 1.90 (1.42, 2.55) <sup>***</sup> | 1.77 (1.32, 2.38) <sup>***</sup> | 1.60 (1.19, 2.16) <sup>**</sup> |
| <b>Poor</b>    | 3.21 (2.14, 4.80) <sup>***</sup> | 2.52 (1.65, 3.84) <sup>***</sup> | 1.88 (1.22, 2.89) <sup>**</sup> |

Ref=reference; OR=odds ratio; CI=confidence interval

Model 1: adjusted for age, sex, income, education, occupation, smoking, alcohol use

Model 2: additionally adjusted for self-rated health, comorbidities

<sup>\*\*</sup>P<0.01

<sup>\*\*\*</sup>P<0.001
